# Supplementary material for: Water oxidation catalyzed by a charge-neutral mononuclear ruthenium(iii) complex
Source: Royal Society of Chemistry journal article supplement (doi:10.1039/c6dt04160d), 2016-12-16
Supplement: c6dt04160d1.pdf [file c6dt04160d1.pdf]

## Supporting Information

for

### **Water Oxidation Catalyzed by Charge-neutral Mononuclear Ruthenium(III) Complex**

Zhongkai Lu,<sup>a</sup> Yan Gao,<sup>\*a</sup> Hu Chen<sup>a</sup> Zhao Liu,<sup>a</sup> Licheng Sun<sup>a,b</sup>

<sup>a</sup>State Key Laboratory of Fine Chemicals, Institute of Artificial Photosynthesis, DUT-KTH Joint Education and Research Center on Molecular Devices, Dalian University of Technology (DUT), Dalian 116024, China.

<sup>b</sup>Department of Chemistry, School of Chemical Science and Engineering, KTH Royal Institute of Technology, 10044 Stockholm, Sweden.

Corresponding address:

E-mail: dr.gaoyan@dlut.edu.cn.

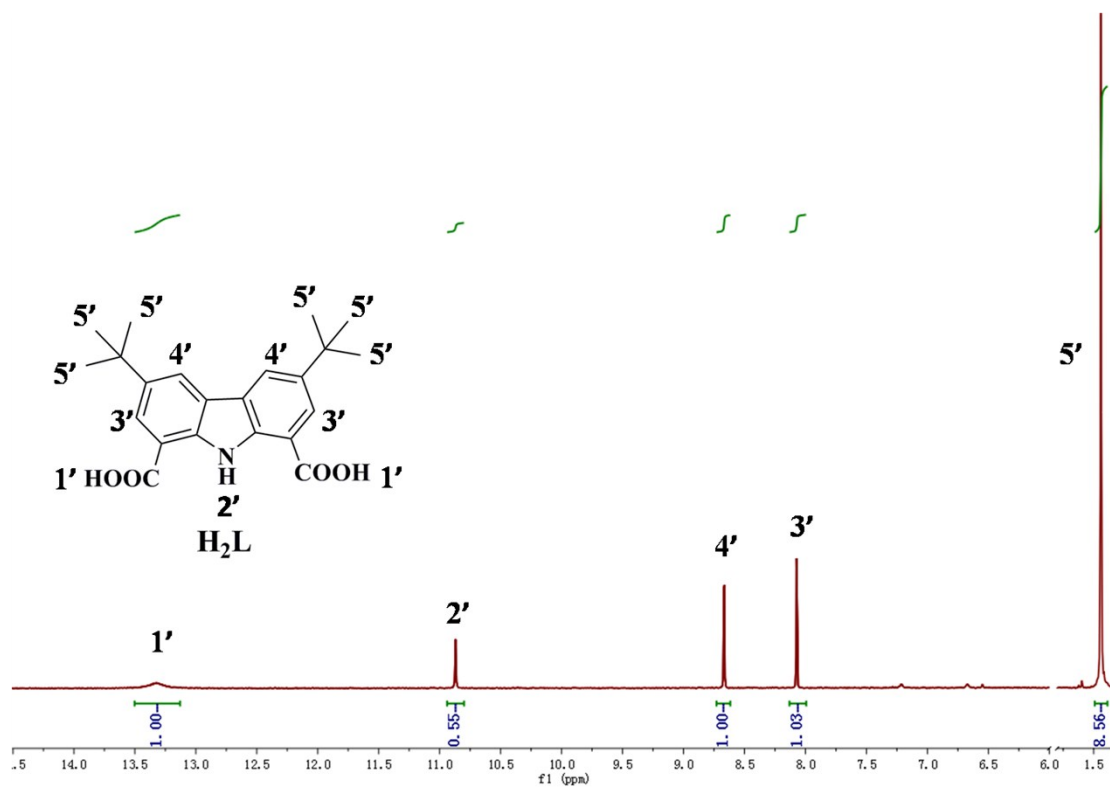

Figure S1.  $^1H$  NMR of  $H_2L$  in  $d_6$ -DMSO.

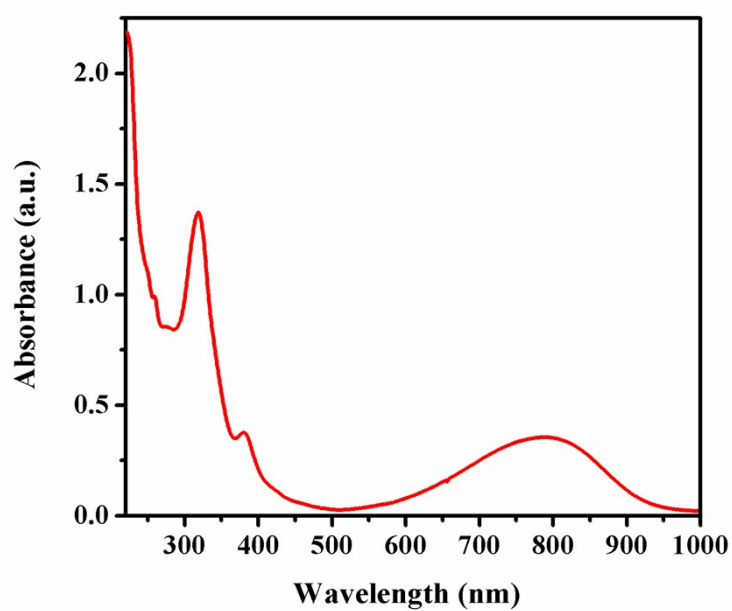

Figure S2. UV-vis. absorption spectra of **1** in  $CF_3CH_2OH$  solution.

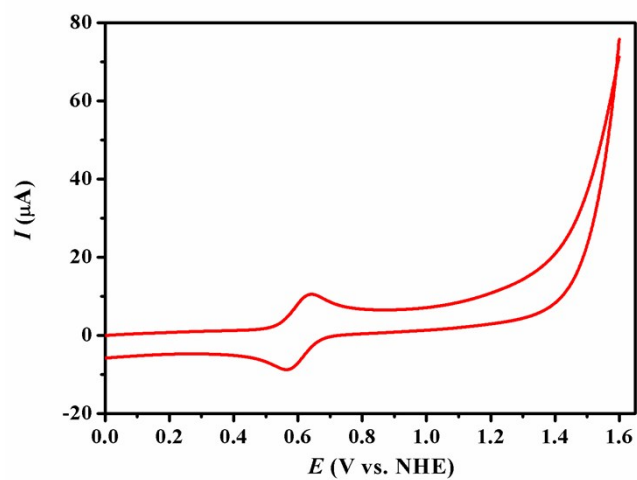

**Figure S3.** CV curve of **1** in pH 6.86 phosphate buffer containing 30%  $\text{CF}_3\text{CH}_2\text{OH}$  (scan rate = 100 mV/s).

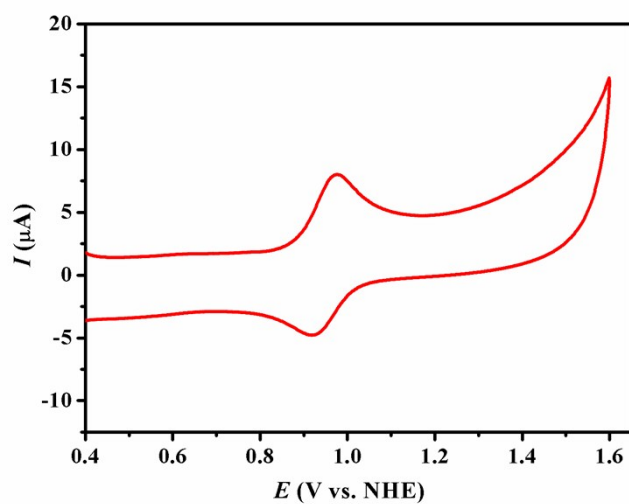

**Figure S4.** CV curve of **1** in pH 1.0  $\text{CF}_3\text{SO}_3\text{H}$  aqueous solution containing 10%  $\text{CF}_3\text{CH}_2\text{OH}$  (scan rate = 100 mV/s).

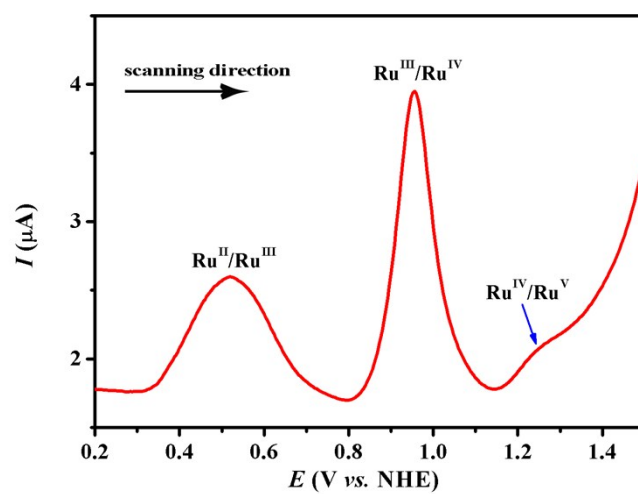

**Figure S5.** DPV curve of **1** in pH 1.0 CF<sub>3</sub>SO<sub>3</sub>H aqueous solution containing 10% CF<sub>3</sub>CH<sub>2</sub>OH.

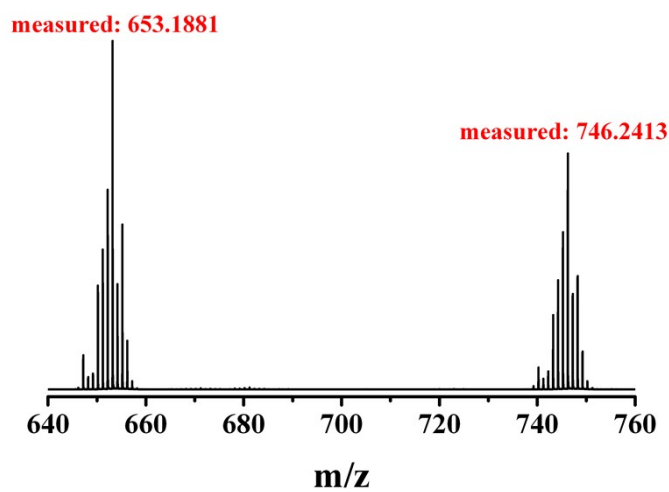

**Figure S6.** HRMS spectra (positive mode) of [Ru<sup>III</sup>(L)(pic)<sub>3</sub> + H]<sup>+</sup> (calculated: 746.2406) and [Ru<sup>III</sup>(L)(pic)<sub>2</sub> + H]<sup>+</sup> (calculated: 653.1828).

**Table S1.** Summary of the Metrical Data for **1**.

| <b>1</b>                                             |                                                                                       |
|------------------------------------------------------|---------------------------------------------------------------------------------------|
| Empirical formula                                    | C <sub>40</sub> H <sub>43</sub> N <sub>4</sub> O <sub>4</sub> Ru, 2(H <sub>2</sub> O) |
| Formula weight                                       | 780.89                                                                                |
| Crystal system                                       | orthorhombic                                                                          |
| Space group                                          | P bca                                                                                 |
| Temperature/K                                        | 298(2)                                                                                |
| <i>a</i> /Å                                          | 9.758(3)                                                                              |
| <i>b</i> /Å                                          | 18.451(5)                                                                             |
| <i>c</i> /Å                                          | 42.443(11)                                                                            |
| $\alpha$ /°                                          | 90                                                                                    |
| $\beta$ /°                                           | 90                                                                                    |
| $\gamma$ /°                                          | 90                                                                                    |
| <i>V</i> /Å <sup>3</sup>                             | 7642(4)                                                                               |
| <i>Z</i>                                             | 8                                                                                     |
| Density (calculated)/g cm <sup>-3</sup>              | 1.358                                                                                 |
| Crystal size/mm <sup>3</sup>                         | 0.3 × 0.2 × 0.1                                                                       |
| <i>F</i> (000)                                       | 3256                                                                                  |
| Theta range for data collection/°                    | 1.92 to 25.01                                                                         |
| Absorption coefficient /mm <sup>-1</sup>             | 0.461                                                                                 |
| Reflections collected                                | 32295                                                                                 |
| Independent reflections                              | 6490 [ <i>R</i> <sub>int</sub> = 0.1737, <i>R</i> <sub>sigma</sub> = 0.1481]          |
| Index ranges                                         | -11 ≤ <i>h</i> ≤ 8, -21 ≤ <i>k</i> ≤ 21, -50 ≤ <i>l</i> ≤ 47                          |
| Data/restraints/parameters                           | 6490/36/469                                                                           |
| Goodness-of-fit on <i>F</i> <sup>2</sup>             | 1.026                                                                                 |
| Final <i>R</i> indexes [ <i>I</i> ≥ 2σ ( <i>I</i> )] | <i>R</i> <sub>1</sub> = 0.0785, <i>wR</i> <sub>2</sub> = 0.1434                       |
| Final <i>R</i> indexes [all data]                    | <i>R</i> <sub>1</sub> = 0.1888, <i>wR</i> <sub>2</sub> = 0.1838                       |
| Largest diff. peak and hole / e Å <sup>-3</sup>      | 0.654/-0.832                                                                          |
